# Supplementary material for: Screening and Identification of Novel Soluble Epoxide Hydrolase Inhibitors from Corn Gluten Peptides
Source: MDPI journal article supplement (doi:10.3390/foods11223695), 2022-11-18
Supplement: s1 [file s1]

## Supplementary Materials

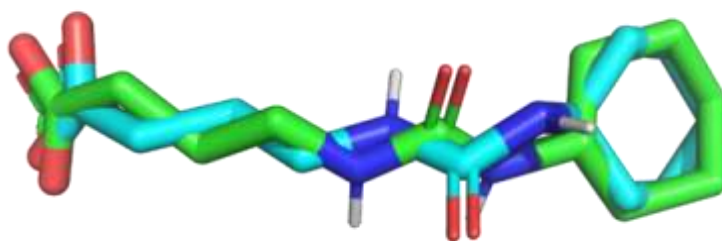

**Figure S1.** The alignment between MOE docked pose (cyan) and native pose (green).

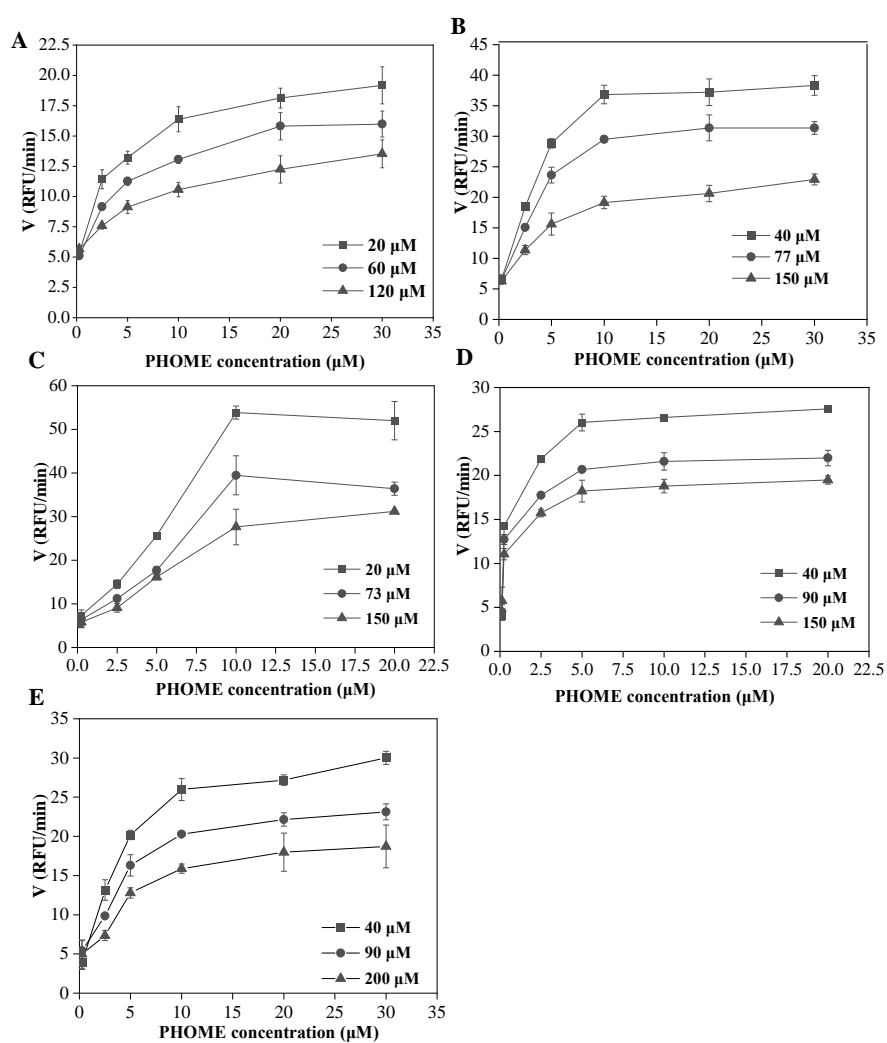

**Figure S2.** Inhibition kinetics of peptides WEY (A), WWY (B), WYW (C), YFW (D), and YFY (E) on sEH.

Table S1: Physicochemical properties and toxicity of sEH inhibitory peptides.

| No. | Sequence | MW (Da) | pI   | Net charge<br>at pH 7 | Water<br>solubility | Toxicity  |
|-----|----------|---------|------|-----------------------|---------------------|-----------|
| 1   | WEY      | 496.52  | 0.95 | -1                    | good                | non-toxic |
| 2   | WYW      | 553.61  | 3.44 | 0                     | poor                | non-toxic |
| 3   | YFW      | 514.57  | 3.31 | 0                     | poor                | non-toxic |
| 4   | WWY      | 553.61  | 3.51 | 0                     | poor                | non-toxic |
| 5   | YFY      | 491.53  | 3.37 | 0                     | poor                | non-toxic |
